# Supplementary material for: Control of Treg cell homeostasis and immune equilibrium by Lkb1 in dendritic cells
Source: PubMed Central journal article supplement (PMC6294005; doi:10.1038/s41467-018-07545-8), 2018-12-13
Supplement: 41467_2018_7545_MOESM1_ESM.pdf [file 41467_2018_7545_MOESM1_ESM.pdf]

Chen, S et al.: Control of T<sub>reg</sub> cell homeostasis and immune equilibrium by Lkb1 in dendritic cells

Supplementary materials: 17 Figures; 5 tables

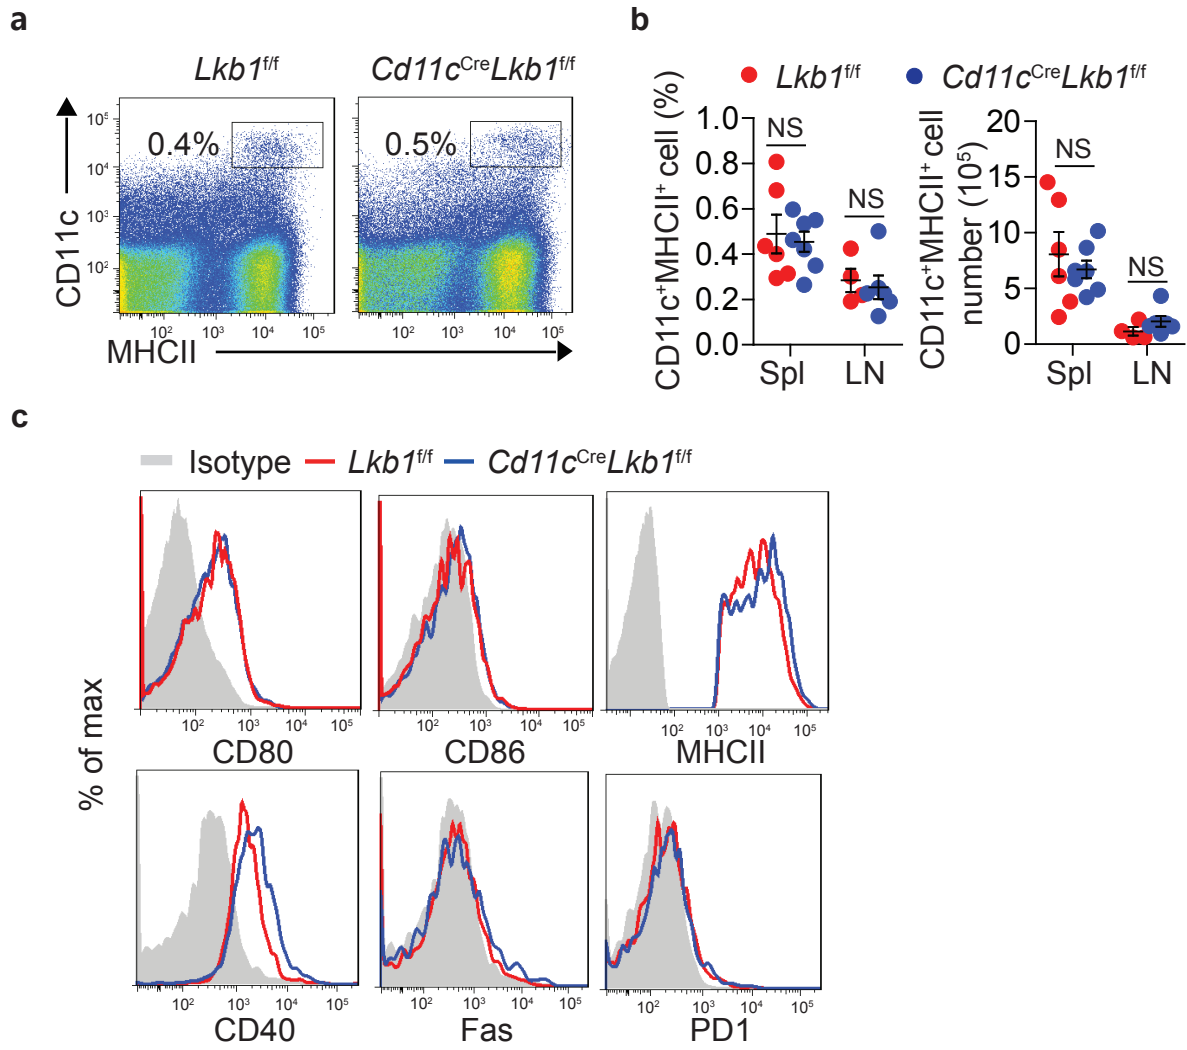

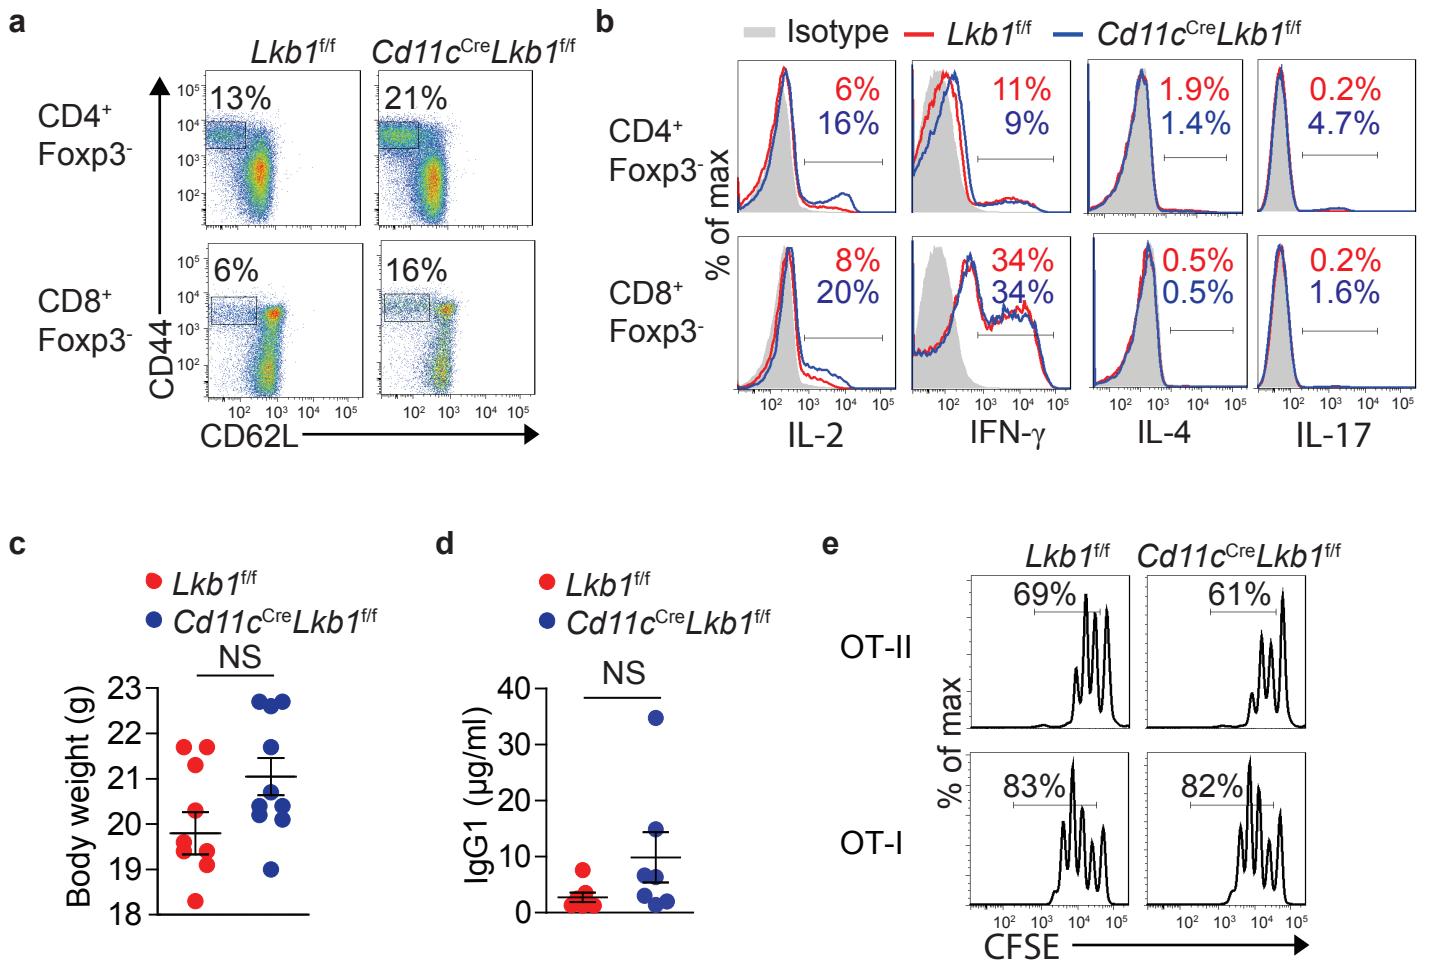

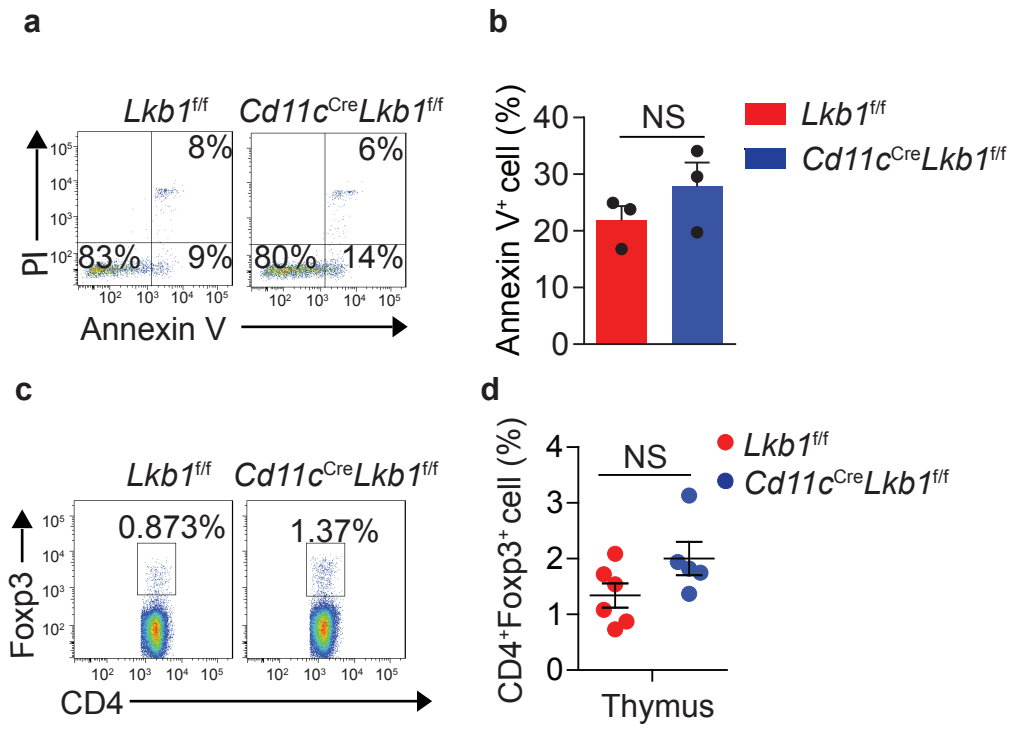

**a**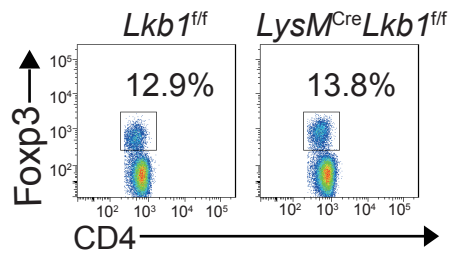**b**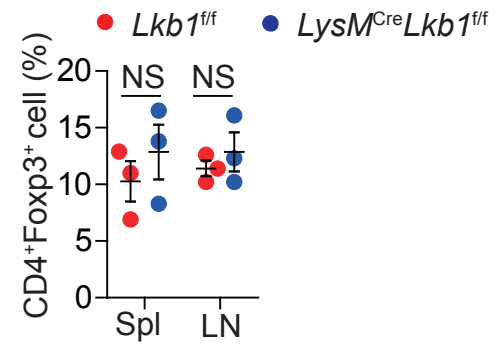**c**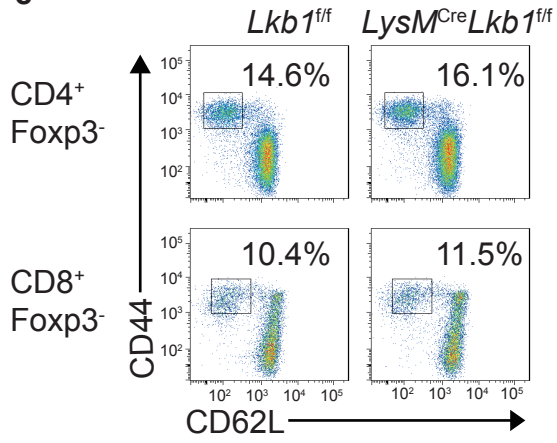**d**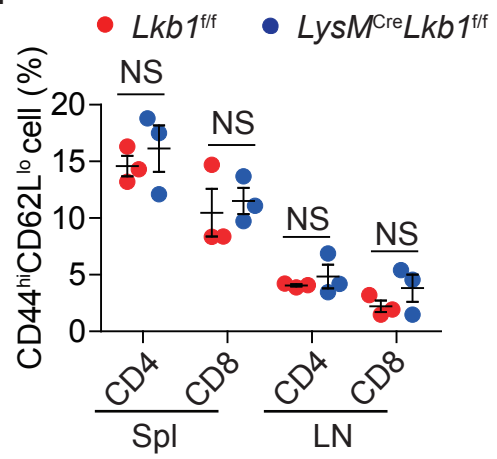

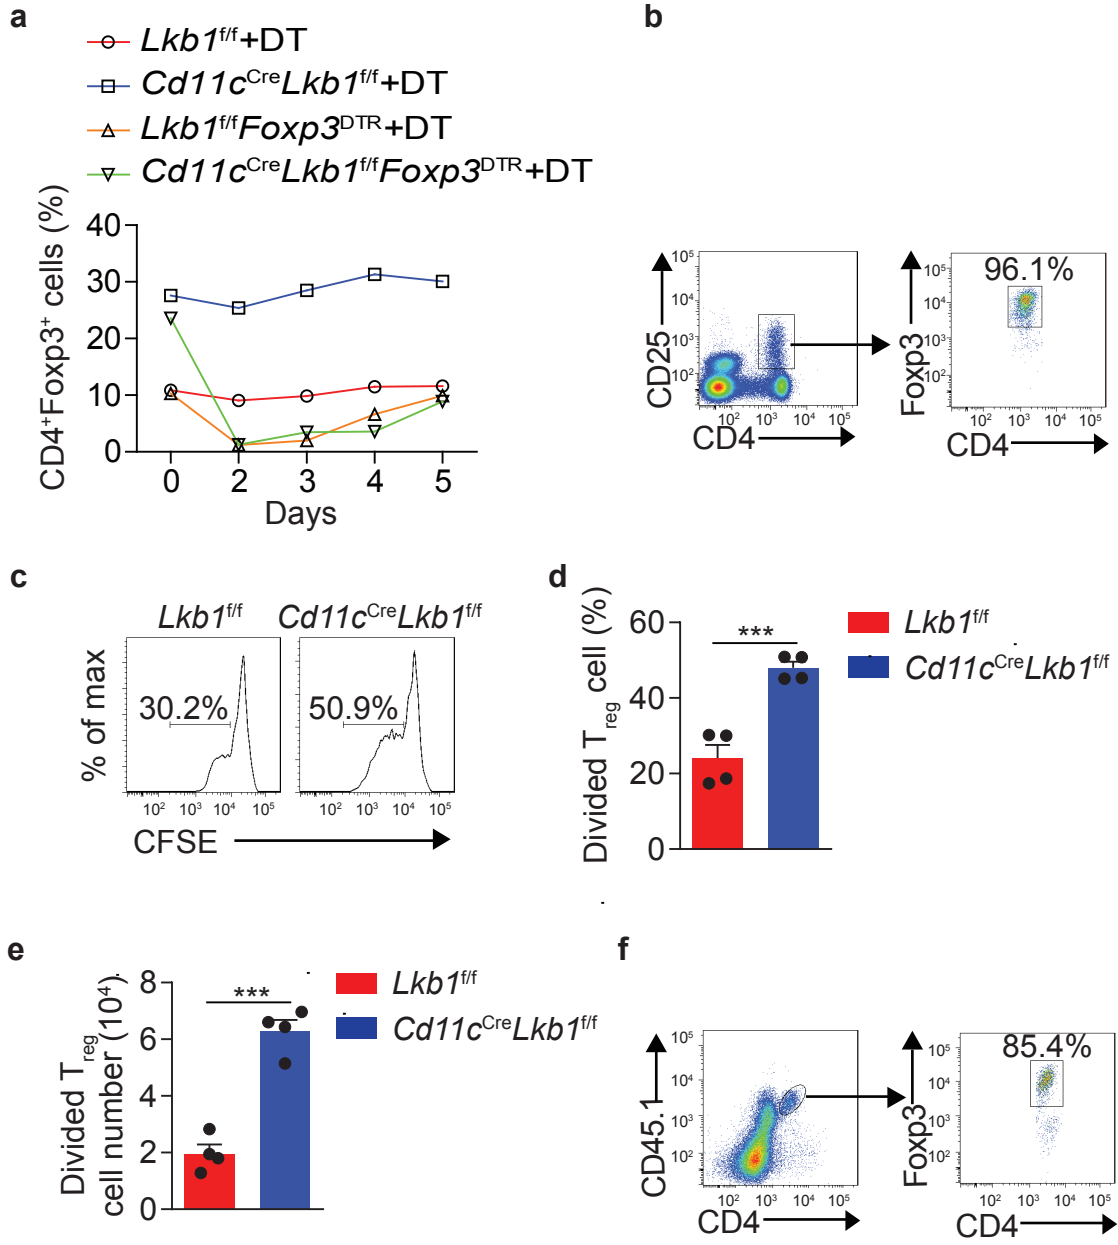

**a**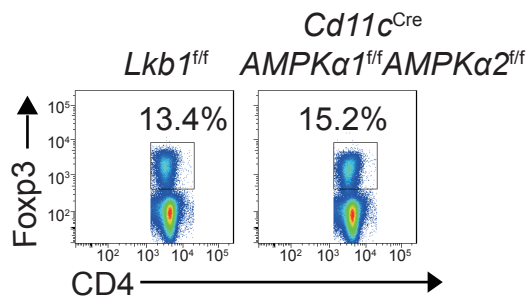**b**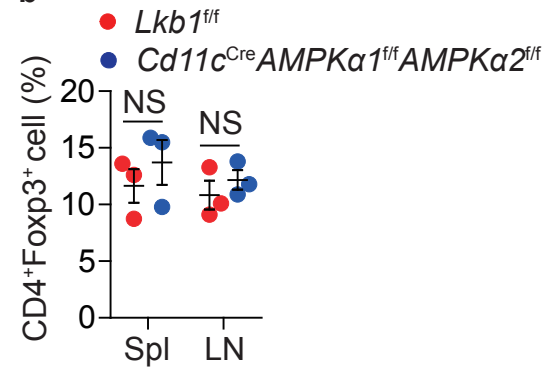**c**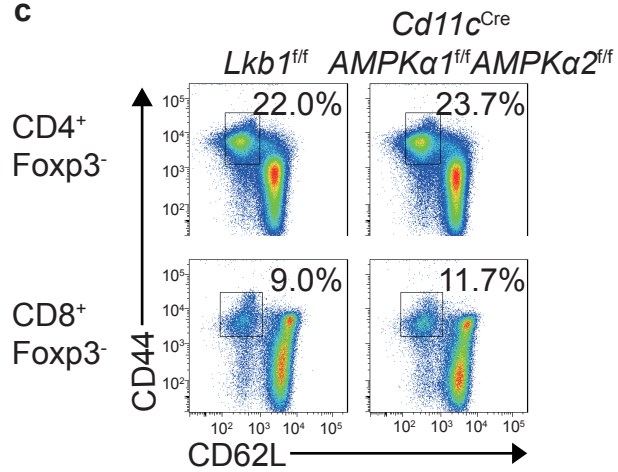**d**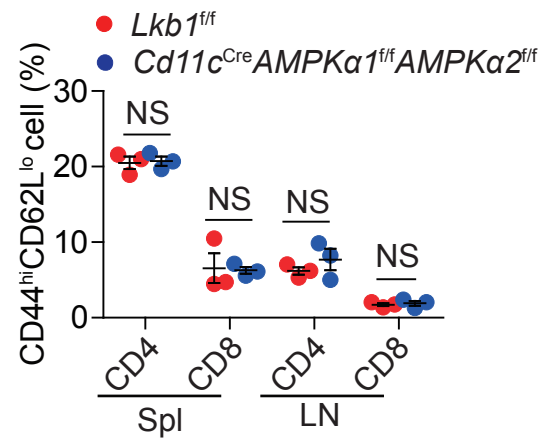

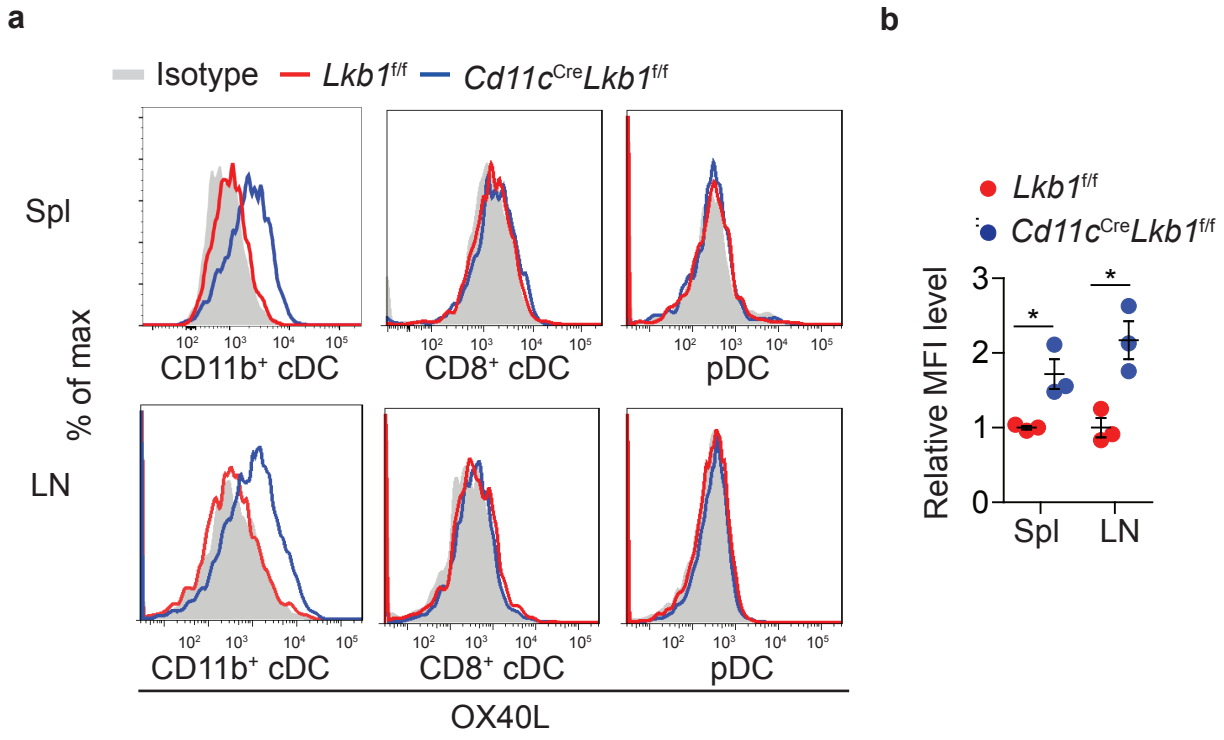



**a**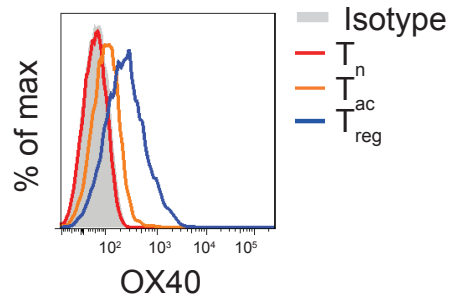**b**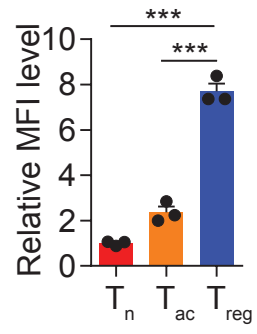

a

- *Lkb1<sup>ff</sup>*+IgG2a
- *Lkb1<sup>ff</sup>*+anti-OX40L
- *Cd11c<sup>Cre</sup>Lkb1<sup>ff</sup>*+IgG2a
- *Cd11c<sup>Cre</sup>Lkb1<sup>ff</sup>*+anti-OX40L

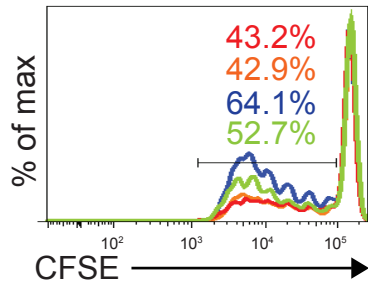

- *Lkb1<sup>ff</sup>*+IgG
- *Lkb1<sup>ff</sup>*+anti-CD80
- *Cd11c<sup>Cre</sup>Lkb1<sup>ff</sup>*+IgG
- *Cd11c<sup>Cre</sup>Lkb1<sup>ff</sup>*+anti-CD80

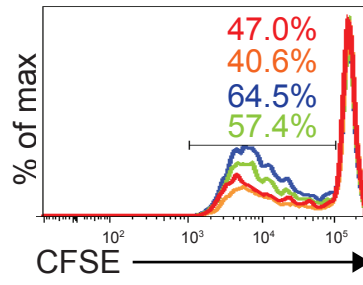

- *Lkb1<sup>ff</sup>*+IgG
- *Lkb1<sup>ff</sup>*+anti-CD86
- *Cd11c<sup>Cre</sup>Lkb1<sup>ff</sup>*+IgG
- *Cd11c<sup>Cre</sup>Lkb1<sup>ff</sup>*+anti-CD86

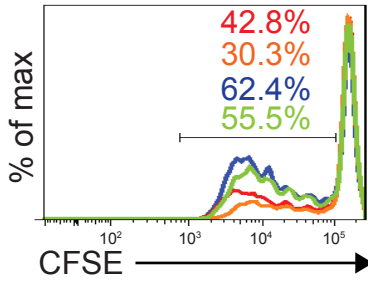

- *Lkb1<sup>ff</sup>*+IgG
- *Lkb1<sup>ff</sup>*+anti-anti-CD80+anti-CD86
- *Cd11c<sup>Cre</sup>Lkb1<sup>ff</sup>*+IgG
- *Cd11c<sup>Cre</sup>Lkb1<sup>ff</sup>*+anti-CD80+anti-CD86

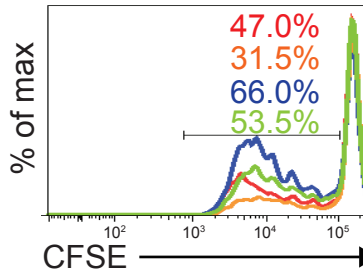

b

- *Lkb1<sup>ff</sup>*+Isotype
- *Lkb1<sup>ff</sup>*+Neutralizing Ab
- *Cd11c<sup>Cre</sup>Lkb1<sup>ff</sup>*+Isotype
- *Cd11c<sup>Cre</sup>Lkb1<sup>ff</sup>*+Neutralizing Ab

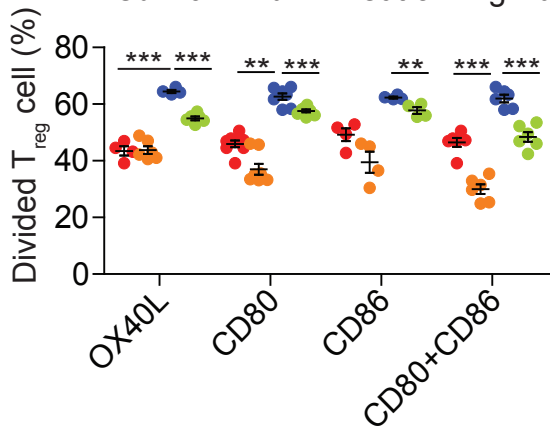

- *Lkb1<sup>ff</sup>*+Isotype
- *Lkb1<sup>ff</sup>*+Neutralizing Ab
- *Cd11c<sup>Cre</sup>Lkb1<sup>ff</sup>*+Isotype
- *Cd11c<sup>Cre</sup>Lkb1<sup>ff</sup>*+Neutralizing Ab

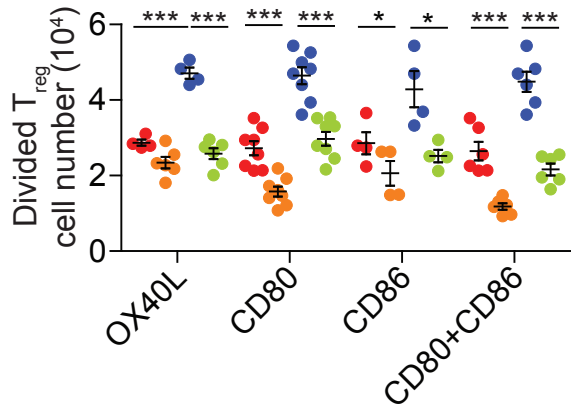

**a**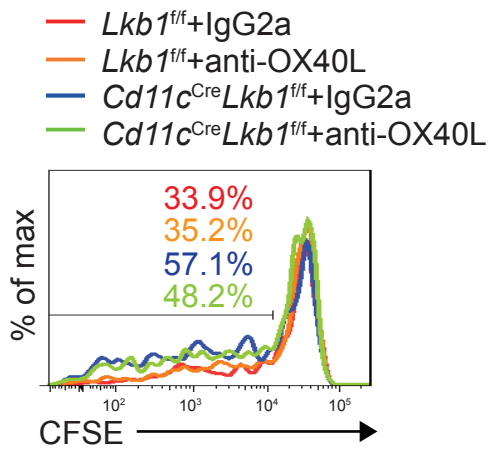**b**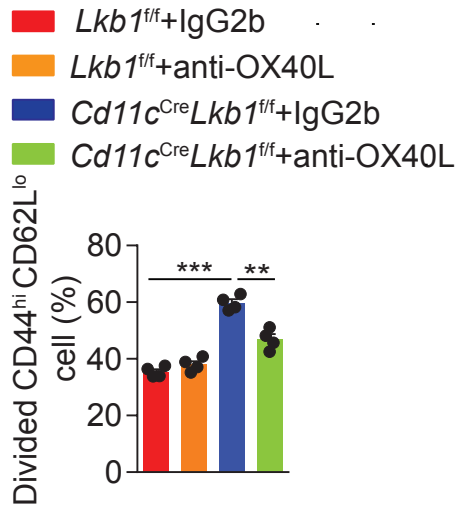**c**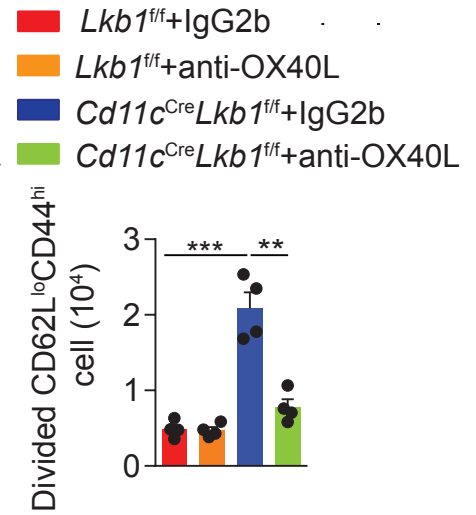**d**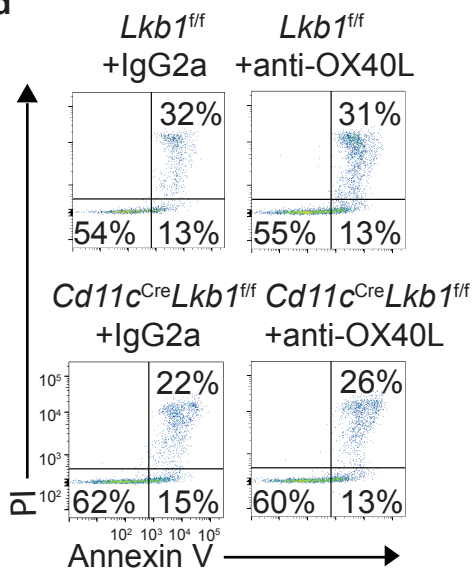**e**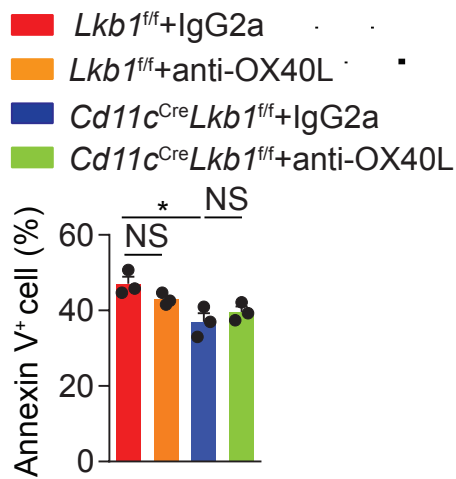

**a**

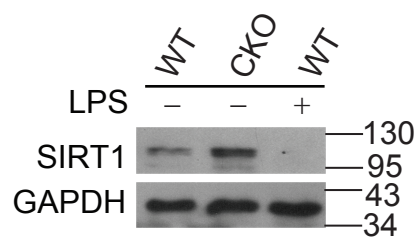

**a**

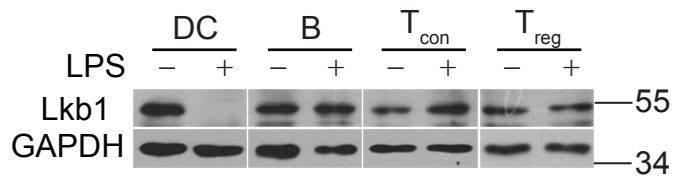

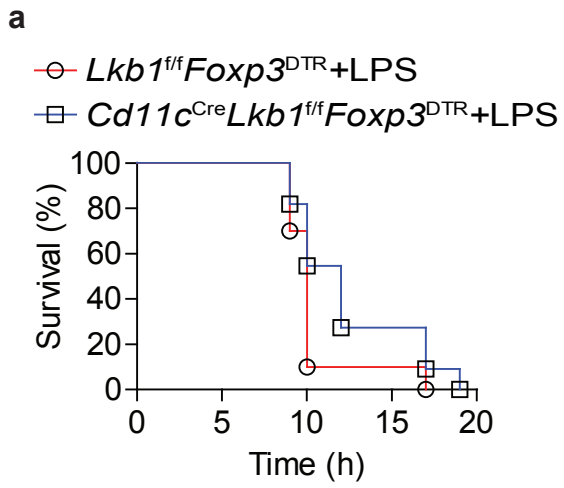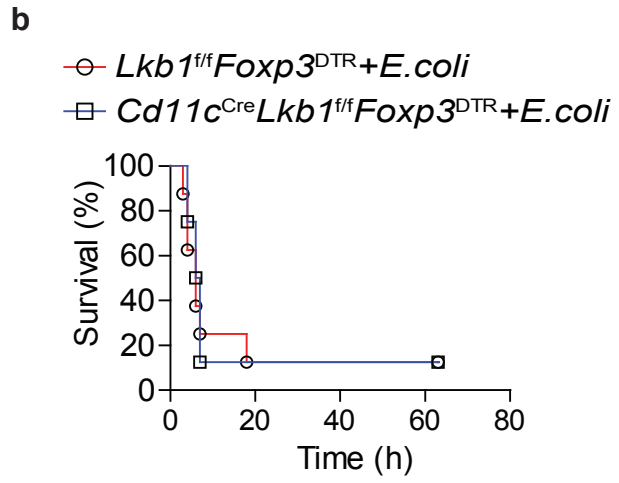

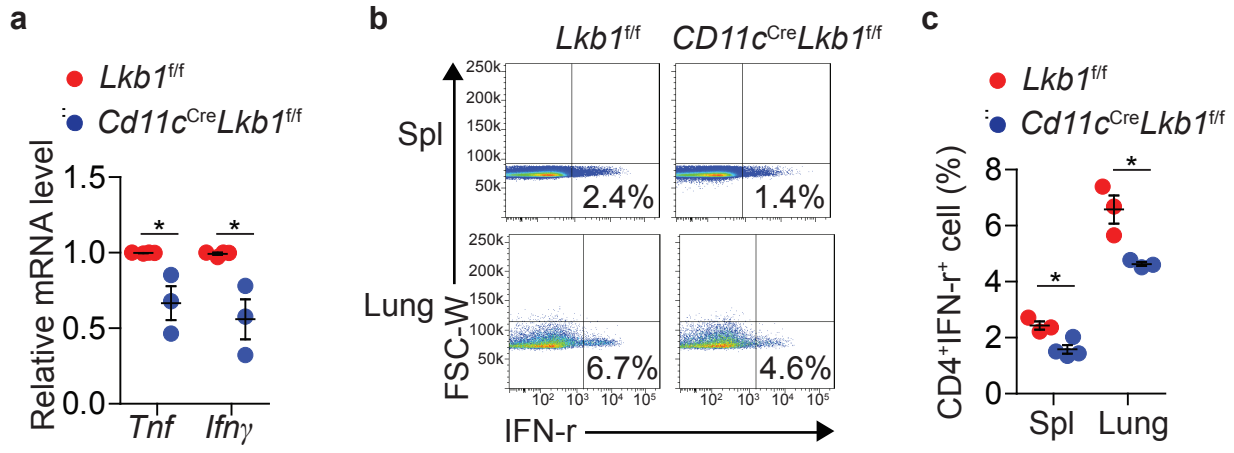

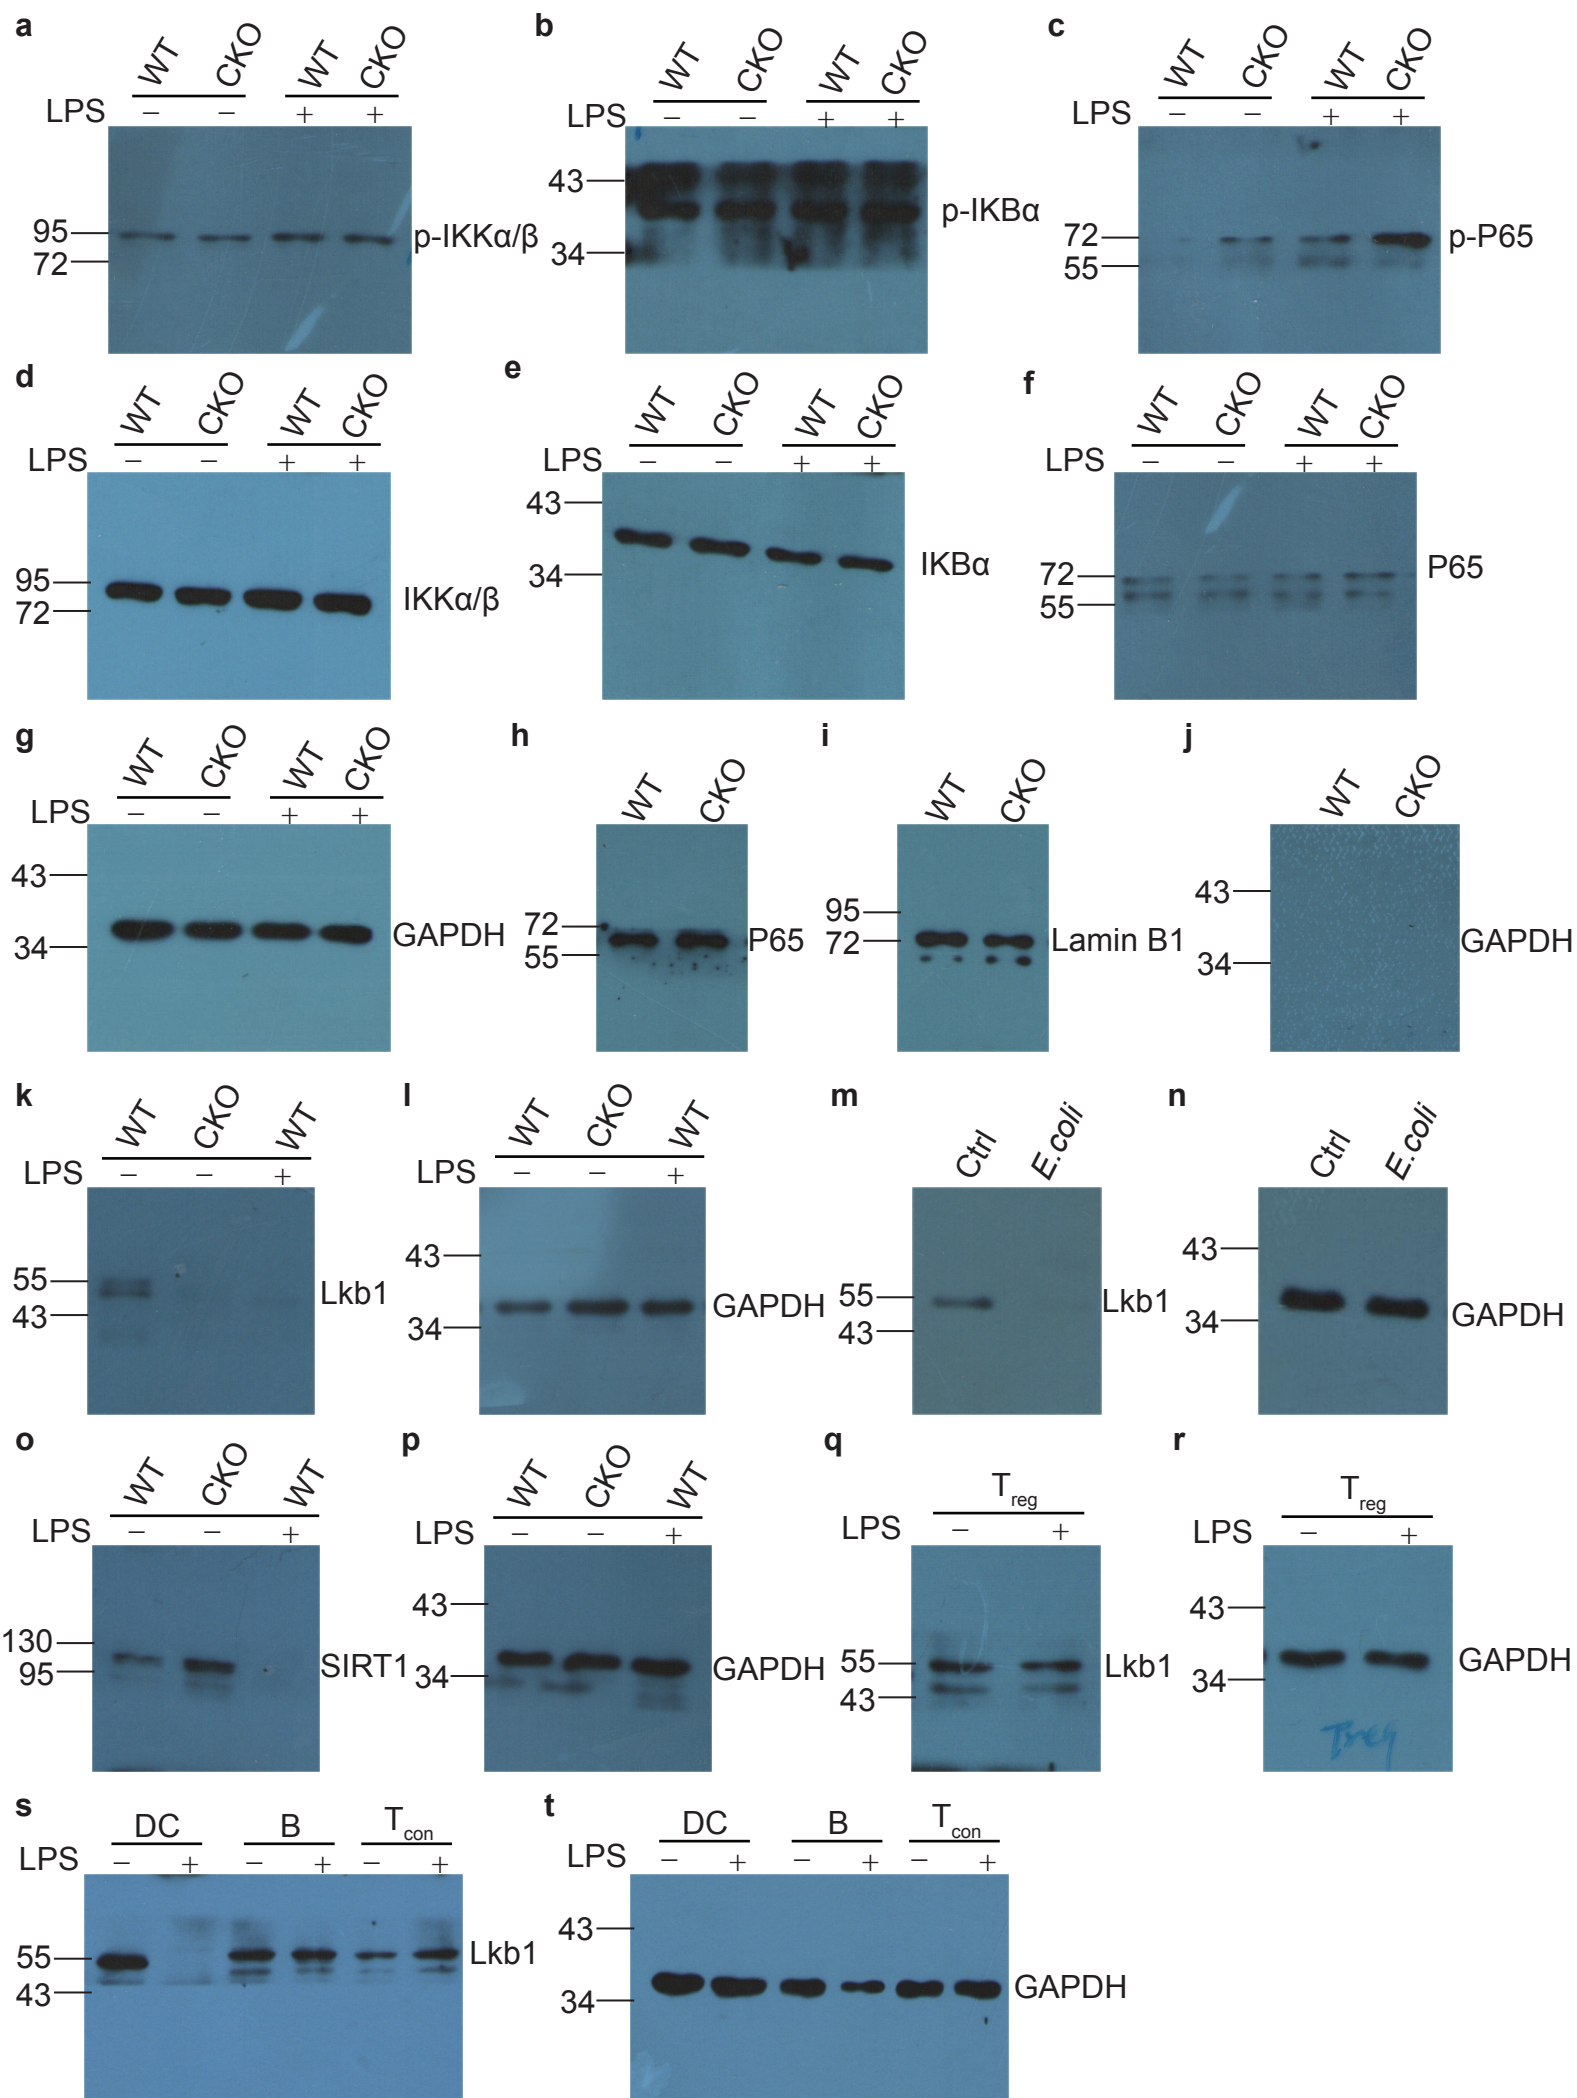

Supplementary Figure 15



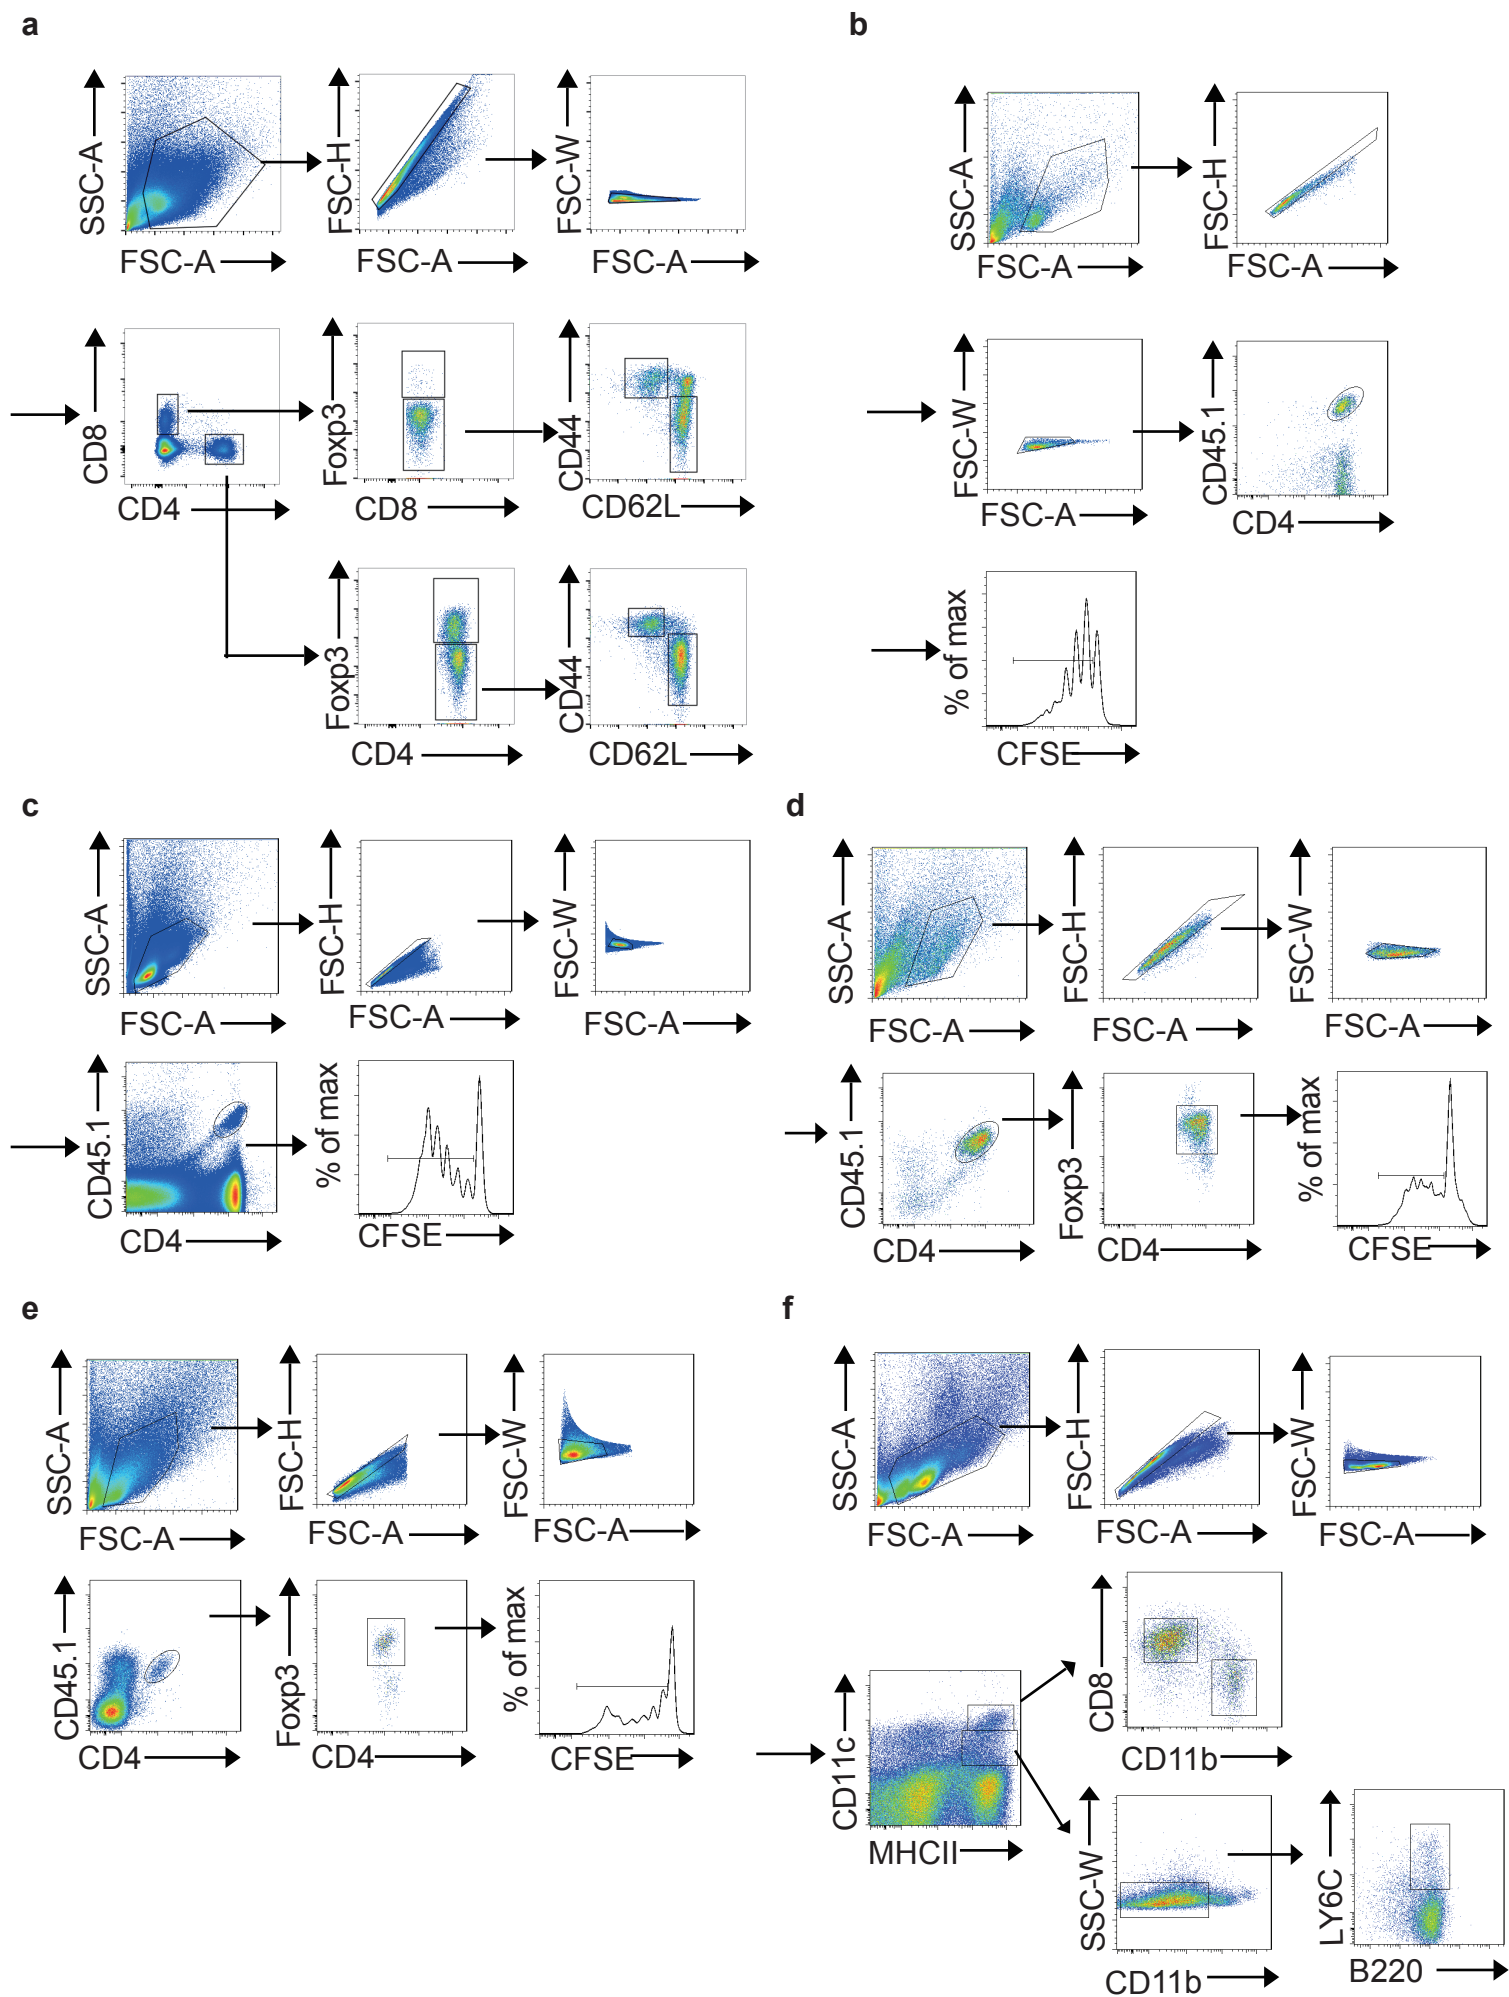

**a**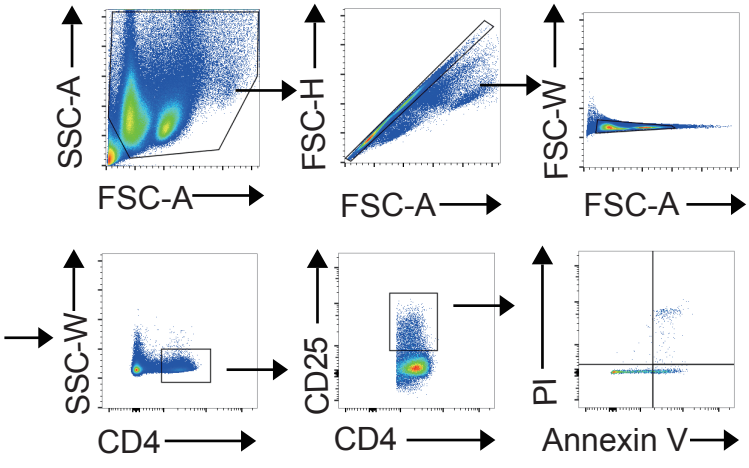**b**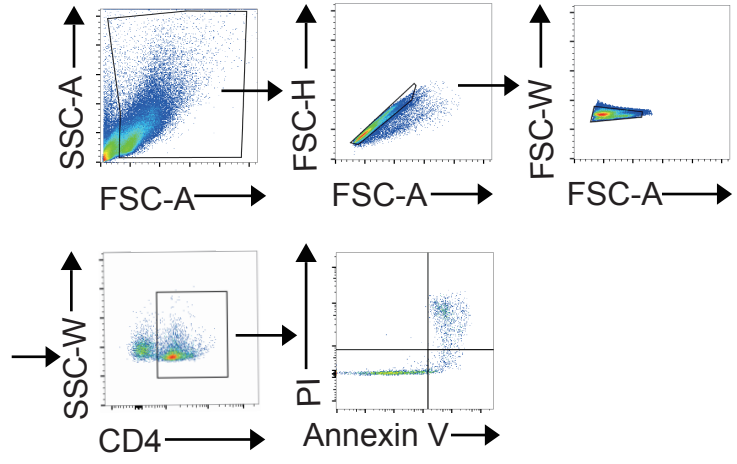

Supplementary Table 1. Schematic description of conserved NF- $\kappa$ B binding site in *Ox40l* locus

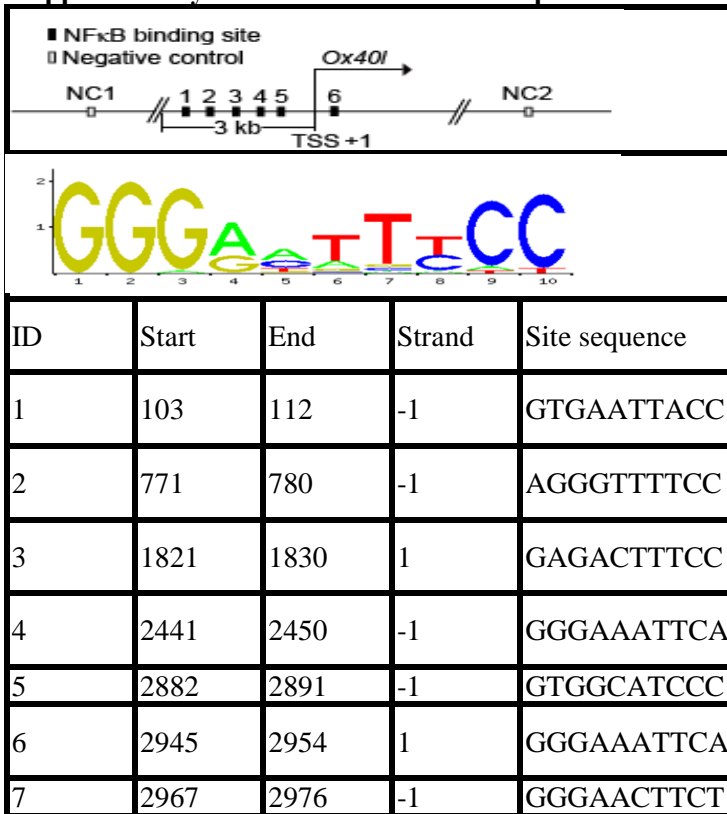

**Supplementary Table 2. Oligonucleotide primers**

| Primer/Purpose                                         | 5'-Sequence-3'                                            |
|--------------------------------------------------------|-----------------------------------------------------------|
| <i>Ox40l</i> /q-PCR of mouse <i>Ox40l</i> cDNA         | F: GAAGAAGACGCTAAGGCTGGT<br>R: GAGCTGATGAATAGTTGCCCAT     |
| <i>Ox40</i> /q-PCR of mouse <i>Ox40</i> cDNA           | F: TACCTACCCAGTGGTCACAA<br>R: ACGGATGACATAGAGTATCCCTG     |
| <i>Lkb1</i> /q-PCR of mouse <i>Lkb1</i> cDNA           | F: GCCAACGTCAAGAAGGAGAT<br>R: CGCAGTACTCCATCACCATATAC     |
| <i>Cxcl11</i> /q-PCR of mouse <i>Cxcl11</i> cDNA       | F: GGCTTCCTTATGTTCAAACAGGG<br>R: GCCGTTACTCGGGTAAATTACA   |
| <i>Il1a</i> /q-PCR of mouse <i>Il1a</i> cDNA           | F: CGAAGACTACAGTTCTGCCATT<br>R: GACGTTTCAGAGGTTCTCAGAG    |
| <i>Il27</i> /q-PCR of mouse <i>Il27</i> cDNA           | F: CTGTTGCTGCTACCCTTGCTT<br>R: CACTCCTGGCAATCGAGATTC      |
| <i>Cxcl9</i> /q-PCR of mouse <i>Cxcl9</i> cDNA         | F: TCCTTTTGGGCATCATCTTCC<br>R: TTTGTAGTGGATCGTGCCTCG      |
| <i>Il15</i> /q-PCR of mouse <i>Il15</i> cDNA           | F: ACATCCATCTCGTGCTACTTGT<br>R: GCCTCTGTTTTAGGGAGACCT     |
| <i>Cd80</i> /q-PCR of mouse <i>Cd80</i> cDNA           | F: ACCCCCAACATAACTGAGTCT<br>R: TTCCAACCAAGAGAAGCGAGG      |
| <i>Cxcl10</i> /q-PCR of mouse <i>Cxcl10</i> cDNA       | F: CCAAGTGCTGCCGTCATTTTC<br>R: GGCTCGCAGGGATGATTTCAA      |
| <i>Il1f9</i> /q-PCR of mouse <i>Il1f9</i> cDNA         | F: TCCTGACTTTGGGGAGGTTTT<br>R: TCACGCTGACTGGGGTACT        |
| <i>Ccl5</i> /q-PCR of mouse <i>Ccl5</i> cDNA           | F: GCTGCTTTGCCTACCTCTCC<br>R: TCGAGTGACAAACACGACTGC       |
| <i>Gapgh</i> /q-PCR of mouse <i>Gapgh</i> cDNA         | F: AGGTCCGGTGTGAACGGATTTG<br>R: TGTAGACCATGTAGTTGAGGTCA   |
| <i>Ox40l</i> -NC1/ChIP-qPCR of mouse <i>Ox40l</i> gene | F: CTGGTCATGTGCTGATGAGT<br>R: TGAAGTTGGCTATGGTGAGAAT      |
| <i>Ox40l</i> -1/ChIP-qPCR of mouse <i>Ox40l</i> gene   | F: CCCACCAGAGTTGGTAATTCA<br>R: ATTTACAGTCCTGGGCAGATG      |
| <i>Ox40l</i> -2/ChIP-qPCR of mouse <i>Ox40l</i> gene   | F: CCACCATGAGGTTCTGAGTTT<br>R: CCCGTTTCAGCTTCCATAGT       |
| <i>Ox40l</i> -3/ChIP-qPCR of mouse <i>Ox40l</i> gene   | F: CTGTTGACGGCTCCATGATAAA<br>R: GCACAGGGATGCTGAACATAA     |
| <i>Ox40l</i> -4/ChIP-qPCR of mouse <i>Ox40l</i> gene   | F: GCTGAATTTCCCTGAAATGAGAAA<br>R: GAGCAACTGCTATGTGTCAGA   |
| <i>Ox40l</i> -5/ChIP-qPCR of mouse <i>Ox40l</i> gene   | F: TTCATAACTGGGATGCCACAA<br>R: GGGAACTTCTATGTGACTAATCTGAA |
| <i>Ox40l</i> -6/ChIP-qPCR of mouse <i>Ox40l</i> gene   | F: CAAGTGGAAGAAGACGCTAAGG<br>R: CTTACCGGAGAGGAAGAGAGTT    |
| <i>Ox40l</i> -NC2/ChIP-qPCR of mouse <i>Ox40l</i> gene | F: ACTTCCAGTGCTTTCCTTACA<br>R: GCTGACCAAGATAGCCAATTC      |

**Supplementary Table 3. Flow cytometry gating strategies.**

| <b>Tissue/<br/>cells</b>                                   | <b>Target<br/>Population</b>                                                                  | <b>Gating Strategy</b>                                                                                                         | <b>Figure number</b>                                                                                    |
|------------------------------------------------------------|-----------------------------------------------------------------------------------------------|--------------------------------------------------------------------------------------------------------------------------------|---------------------------------------------------------------------------------------------------------|
| Spleen,<br>lymph<br>nodes,<br>thymus,<br>lung and<br>brain | CD4 <sup>+</sup> Foxp3 <sup>+</sup> T <sub>reg</sub><br>cells                                 | Immune<br>cells/Singlets/CD4 <sup>+</sup> /Foxp3 <sup>+</sup>                                                                  | Supplementary Figure 16a-><br>Figure 1a,1c,1e,1g,6c,6e,7b,7d<br>and Supplementary Figure<br>3c,4a,6a,8a |
|                                                            | CD4 <sup>+</sup> Foxp3 <sup>-</sup> T<br>cells                                                | Immune<br>cells/Singlets/CD4 <sup>+</sup> /Foxp3 <sup>-</sup>                                                                  | Supplementary Figure 16a-><br>Figure 2b and Supplementary<br>Figure 2a,2b,4c,6c,8a,14b                  |
|                                                            | CD8 <sup>+</sup> Foxp3 <sup>-</sup> T<br>cells                                                | Immune<br>cells/Singlets/CD8 <sup>+</sup> /Foxp3 <sup>-</sup>                                                                  | Supplementary Figure 16a-><br>Supplementary Figure<br>2a,2b,4c,6c                                       |
| Co-cultured<br>cells                                       | CD4 <sup>+</sup> CD45.1 <sup>+</sup> T<br>cells                                               | Immune<br>cells/Singlets/CD4 <sup>+</sup> CD45.1<br>+                                                                          | Supplementary Figure 16b-><br>Figure 1h and Supplementary<br>Figure 2e,10a                              |
| Spleen                                                     | CD4 <sup>+</sup> CD45.1 <sup>+</sup> T<br>cells                                               | Immune<br>cells/Singlets/CD4 <sup>+</sup> CD45.1<br>+                                                                          | Supplementary Figure 16c-><br>Figure 2d,2g                                                              |
| Co-cultured<br>cells                                       | CD4 <sup>+</sup> CD45.1 <sup>+</sup> Fox<br>p3 <sup>+</sup> T <sub>reg</sub> cells            | Immune<br>cells/Singlets/CD4 <sup>+</sup> CD45.1<br><sup>+</sup> /Foxp3 <sup>+</sup>                                           | Supplementary Figure 16d-><br>Figure 3a,3d,3g,4e,5e,6g and<br>Supplementary Figure 9a                   |
| Spleen                                                     | CD4 <sup>+</sup> CD45.1 <sup>+</sup> Fox<br>p3 <sup>+</sup> T <sub>reg</sub> cells            | Immune<br>cells/Singlets/CD4 <sup>+</sup> CD45.1<br><sup>+</sup> /Foxp3 <sup>+</sup>                                           | Supplementary Figure 16e-><br>Figure 3h,4h,5h                                                           |
| Spleen and<br>lymph<br>nodes                               | MHCII <sup>+</sup> CD11c <sup>+</sup><br>DCs                                                  | Immune<br>cells/Singlets/MHCII <sup>+</sup> CD11<br>c <sup>+</sup>                                                             | Supplementary Figure 16f-><br>Figure 4d,5d,8e and<br>Supplementary Figure 1a,1c,                        |
|                                                            | MHCII <sup>+</sup> CD11c <sup>hi</sup> C<br>D11b <sup>+</sup> cDCs                            | Immune<br>cells/Singlets/MHCII <sup>+</sup> CD11<br>c <sup>hi</sup> /CD8 <sup>-</sup> CD11b <sup>+</sup>                       | Supplementary Figure 16f-><br>Supplementary Figure 7a                                                   |
|                                                            | MHCII <sup>+</sup> CD11c <sup>hi</sup> C<br>D8 <sup>+</sup> cDCs                              | Immune<br>cells/Singlets/MHCII <sup>+</sup> CD11<br>c <sup>hi</sup> / CD8 <sup>+</sup> CD11b <sup>-</sup>                      | Supplementary Figure 16f-><br>Supplementary Figure 7a                                                   |
|                                                            | MHCII <sup>+</sup> CD11c <sup>low</sup><br>CD11b-B220 <sup>+</sup> LY6<br>C <sup>+</sup> pDCs | Immune<br>cells/Singlets/MHCII <sup>+</sup> CD11<br>c <sup>low</sup> /CD11b <sup>-</sup> / B220 <sup>+</sup> LY6C <sup>+</sup> | Supplementary Figure 16f-><br>Supplementary Figure 7a                                                   |
| Spleen                                                     | CD4 <sup>+</sup> CD25 <sup>+</sup> T <sub>reg</sub><br>cells                                  | Immune cells/Singlets/<br>CD4 <sup>+</sup> /CD25 <sup>+</sup>                                                                  | Supplementary Figure 17a-><br>Supplementary Figure 3a                                                   |
| Co-cultured<br>cells                                       | CD4 <sup>+</sup> T cells                                                                      | Immune<br>cells/Singlets/CD4 <sup>+</sup>                                                                                      | Supplementary Figure 17b-><br>Supplementary Figure 10d                                                  |
