# Supplementary material for: Control of Treg cell homeostasis and immune equilibrium by Lkb1 in dendritic cells
Source: PubMed Central journal article supplement (PMC6294005; doi:10.1038/s41467-018-07545-8), 2018-12-13
Supplement: 41467_2018_7545_MOESM2_ESM.pdf [file 41467_2018_7545_MOESM2_ESM.pdf]

## Description of Additional Supplementary Files

**Supplementary Data 1.** Gene expression alterations in Lkb1-deficient DCs ( $\geq 1.5$  fold change)

**Supplementary Data 2.** Gene expression alterations in LPS-treated DCs ( $\geq 1.5$  fold change)
